# Supplementary material for: Sleep and modern life: a population-based study
Source: Research Square preprint supplement (doi:10.21203/rs.3.rs-6658446/v1), 2025-05-29
Supplement: Supplementary file 1 [file d9c159523bd2fc34833be405.docx]

# Supplementary material: additional statistics

## Univariate and bivariate statistics

Please note that, if not specified otherwise, the tables display weighted counts.

Table . Descriptive statistics for socio-demographic data, lifestyle, and medication

|  | | | **Participants N=835 (%)** | | **Female n= 462 (55,4%)** | | **Male  n= 373 (44,6%)** | |
| --- | --- | --- | --- | --- | --- | --- | --- | --- |
| Age range | | 18-30 | 171 | (20,5%) | 112 | (24,2%) | 59 | (15,9%) |
| 31-40 | 169 | (20,2%) | 89 | (19,2%) | 80 | (21,5%) |
| 41-50 | 176 | (21,1%) | 104 | (22,4%) | 72 | (19,3%) |
| 51-60 | 133 | (16,0%) | 75 | (16,2%) | 58 | (15,7%) |
| >60 | 186 | (22,2%) | 83 | (17,9%) | 103 | (27,6%) |
| education | | university: 5+ years | 616 | (73,8%) | 329 | (71,1%) | 288 | (77,2%) |
| university: 3-4 year | 118 | (14,2%) | 85 | (18,4%) | 33 | (8,9%) |
| upper secondary | 56 | (6,8%) | 30 | (6,5%) | 26 | (7,1%) |
| lower secondary or less | 22 | (2,6%) | 12 | (2,5%) | 10 | (2,7%) |
| N/A | 22 | (2,7%) | 7 | (1,5%) | 15 | (4,1%) |
| BMI>35 kg/m2 | | DK | 109 | (13,1%) | 44 | (9,6%) | 65 | (17,4%) |
| not obese | 655 | (78,5%) | 384 | (83,0%) | 272 | (72,9%) |
| obese | 71 | (8,4%) | 35 | (7,5%) | 36 | (9,6%) |
| permanent sport activity | | NA | 6 | (0,7%) | 2 | (0,5%) | 3 | (0,9%) |
| no | 505 | (60,5%) | 303 | (65,5%) | 202 | (54,2%) |
| yes | 325 | (38,9%) | 157 | (34,0%) | 167 | (44,9%) |
| Do you  usually drive? | | no | 284 | (34,0%) | 218 | (47,2%) | 66 | (17,7%) |
| yes | 551 | (66,0%) | 244 | (52,8%) | 307 | (82,3%) |
| Do you drink  alcohol in the evening? | | no | 650 | (77,9%) | 404 | (87,3%) | 247 | (66,2%) |
| yes | 185 | (22,1%) | 59 | (12,7%) | 126 | (33,8%) |
| Do you smoke? | | no | 618 | (74,0%) | 337 | (72,9%) | 281 | (75,4%) |
| yes | 217 | (26,0%) | 126 | (27,1%) | 92 | (24,6%) |
| Depression | | no | 797 | (95,5%) | 430 | (93,1%) | 367 | (98,4%) |
| yes | 38 | (4,5%) | 32 | (6,9%) | 6 | (1,6%) |
| Do you  take medication … | For the heart and blood vessels | | 178 | (21,32%) | 80 | (17,41%) | 98 | (26,16%) |
| For mood or anxiety | | 31 | (3,67%) | 18 | (3,84%) | 13 | (3,46%) |
| For sleep | | 46 | (5,46%) | 39 | (8,34%) | 7 | (1,88%) |
| For pain | | 187 | (22,34%) | 130 | (28,06%) | 57 | (15,25%) |
| For breathing | | 21 | (2,50%) | 16 | (3,49%) | 5 | (1,27%) |
| For diabetes | | 49 | (5,92%) | 20 | (4,30%) | 30 | (7,92%) |
| For a thyroid condition | | 43 | (5,09%) | 40 | (8,66%) | 3 | (0,67%) |
| To improve memory | | 41 | (4,88%) | 26 | (5,64%) | 15 | (3,94%) |
| Other medication | | 38 | (4,54%) | 29 | (6,35%) | 9 | (2,28%) |

Table . Sleeping hours by gender, age, and education

|  | |  | | How many hours do you usually sleep… | | | | | | | | | | How many hours are you missing per 24 hours to feel refreshed? | | | | | | |
| --- | --- | --- | --- | --- | --- | --- | --- | --- | --- | --- | --- | --- | --- | --- | --- | --- | --- | --- | --- | --- |
|  | | N (%) | | …in a 24-hour period? | | | | | … in a 24-hour period on weekends or during vacations? | | | | |
| Min | Mean | Std.Dev. | | Max | Min | Mean | | Std.Dev. | Max | Min | | Mean | | Std.Dev. | Max | |
| **TOTAL SAMPLE** | | 835 | (100%) | 2,5 | **7,1** | (1,1) | 12,0 | | 0,0 | | **8,1** | (1,5) | 16,0 | | 0,0 | | **0,8** | (1,2) | | 14,0 |
| gender | Female | 462 | (55%) | 2,5 | **7,0** | (1,1) | 10,0 | | 0,0 | | **8,1** | (1,5) | 16,0 | | 0,0 | | **0,9** | (1,3) | | 14,0 |
| Male | 373 | (45%) | 4,0 | **7,2** | (1,1) | 12,0 | | 0,0 | | **8,2** | (1,4) | 14,0 | | 0,0 | | **0,5** | (1,1) | | 8,0 |
| Age range | 18-30 | 171 | (21%) | 2,5 | **7,2** | (1,1) | 12,0 | | 2,0 | | **8,9** | (1,6) | 14,0 | | 0,0 | | **1,0** | (1,4) | | 14,0 |
| 31-40 | 169 | (20%) | 4,0 | **7,3** | (1,1) | 10,0 | | 1,0 | | **8,1** | (1,3) | 16,0 | | 0,0 | | **1,0** | (1,3) | | 7,0 |
| 41-50 | 176 | (21%) | 4,5 | **7,2** | (0,9) | 10,0 | | 1,0 | | **8,2** | (1,2) | 11,0 | | 0,0 | | **0,8** | (1,2) | | 8,0 |
| 51-60 | 133 | (16%) | 4,5 | **7,0** | (1,2) | 12,0 | | 5,0 | | **8,0** | (1,3) | 12,0 | | 0,0 | | **0,5** | (0,8) | | 4,0 |
| >60 | 186 | (22%) | 4,0 | **7,0** | (1,0) | 10,0 | | 0,0 | | **7,5** | (1,5) | 10,5 | | 0,0 | | **0,5** | (1,2) | | 8,0 |
| Educa-tion | univ: 5+ | 616 | (74%) | 2,5 | **7,1** | (1,0) | 12,0 | | 0,0 | | **8,1** | (1,5) | 15,0 | | 0,0 | | **0,8** | (1,2) | | 14,0 |
| univ: 3+ | 118 | (14%) | 4,0 | **7,1** | (1,2) | 9,0 | | 5,0 | | **7,9** | (1,5) | 16,0 | | 0,0 | | **0,9** | (1,5) | | 9,0 |
| upper secondary | 56 | (7%) | 5,0 | **7,1** | (1,5) | 12,0 | | 5,0 | | **8,5** | (1,8) | 12,0 | | 0,0 | | **0,9** | (1,2) | | 5,0 |
| less | 22 | (3%) | 4,0 | **8,0** | (1,1) | 10,0 | | 6,0 | | **8,6** | (0,9) | 10,0 | | 0,0 | | **0,3** | (1,2) | | 8,0 |
| N/A | 22 | (3%) | 5,0 | **7,0** | (1,0) | 8,0 | | 1,0 | | **8,4** | (1,2) | 10,0 | | 0,0 | | **0,2** | (0,8) | | 4,0 |

Table . Sleeping environment and sleep quality

|  | | total | | Female | | Male | |
| --- | --- | --- | --- | --- | --- | --- | --- |
| Do you think your bedroom environment is favourable for good sleep quality? | no | 83 | (9,9%) | 55 | (11,8%) | 28 | (7,5%) |
| average | 9 | (1,1%) | 8 | (1,8%) | 1 | (0,3%) |
| yes | 743 | (89,0%) | 400 | (86,4%) | 344 | (92,2%) |
| Is your sleep of good quality? | no | 52 | (6,2%) | 33 | (7,2%) | 18 | (4,9%) |
| average | 350 | (41,9%) | 208 | (45,0%) | 142 | (38,1%) |
| yes | 433 | (51,9%) | 221 | (47,7%) | 212 | (57,0%) |
| Would you say you are an insomniac? | no | 604 | (72,3%) | 281 | (60,7%) | 324 | (86,8%) |
| sometimes | 105 | (12,6%) | 88 | (19,1%) | 17 | (4,5%) |
| yes | 126 | (15,1%) | 93 | (20,2%) | 32 | (8,7%) |
| Does your work significantly affect your sleep schedule? | no | 453 | (54,2%) | 231 | (50,0%) | 221 | (59,4%) |
| sometimes | 209 | (25,1%) | 121 | (26,2%) | 88 | (23,7%) |
| yes | 173 | (20,8%) | 110 | (23,8%) | 63 | (16,9%) |
| Do you have a job that requires you to work at night? | no | 734 | (87,9%) | 410 | (88,6%) | 324 | (86,9%) |
| yes | 101 | (12,1%) | 53 | (11,4%) | 49 | (13,1%) |
| Do you usually sleep alone in your room? | no | 556 | (66,5%) | 306 | (66,2%) | 249 | (66,9%) |
| yes | 280 | (33,5%) | 156 | (33,8%) | 123 | (33,1%) |
| sleeps with the spouse | no | 391 | (46,8%) | 227 | (49,0%) | 164 | (44,0%) |
| yes | 445 | (53,2%) | 236 | (51,0%) | 209 | (56,0%) |
| sleeps with kid(s) | no | 732 | (87,7%) | 394 | (85,1%) | 339 | (90,9%) |
| yes | 103 | (12,3%) | 69 | (14,9%) | 34 | (9,1%) |
| sleeps with pet(s) | no | 759 | (90,9%) | 417 | (90,1%) | 342 | (91,8%) |
| yes | 76 | (9,1%) | 46 | (9,9%) | 30 | (8,2%) |

*Percentages refer to the total number of patients in the study (N= 835).

Table . Sleep hindering biological and lifestyle factors

|  | | total | | Female | | Male | |
| --- | --- | --- | --- | --- | --- | --- | --- |
| Total sample | | 835 | (100,0%) | 462 | (100,0%) | 373 | (100,0%) |
| How many times a night  do you get up to urinate? | 4 | 6 | (0,7%) | 6 | (1,2%) | 0 | (0,0%) |
| 3 | 21 | (2,5%) | 11 | (2,4%) | 10 | (2,6%) |
| 2 | 82 | (9,8%) | 55 | (11,9%) | 27 | (7,2%) |
| 1 | 333 | (39,8%) | 174 | (37,5%) | 159 | (42,7%) |
| 0 | 365 | (43,7%) | 201 | (43,4%) | 164 | (44,1%) |
| NA | 29 | (3,5%) | 16 | (3,5%) | 12 | (3,3%) |
| Do you have pain  that wakes you up at night? | no | 770 | (92,2%) | 418 | (90,4%) | 352 | (94,5%) |
| yes | 65 | (7,8%) | 45 | (9,6%) | 20 | (5,5%) |
| Do you often experience discomfort or pain in your legs that makes it difficult to fall asleep or wakes you up at night with a strong urge to move them (excluding cramps)? | no | 762 | (91,3%) | 411 | (88,8%) | 352 | (94,4%) |
| yes | 73 | (8,7%) | 52 | (11,2%) | 21 | (5,6%) |
| Do you get up at night to smoke? | no | 832 | (99,6%) | 460 | (99,5%) | 371 | (99,6%) |
| yes | 4 | (0,4%) | 2 | (0,5%) | 2 | (0,4%) |
| Do you usually take medication or a substance to help you fall asleep at night? | no | 789 | (94,5%) | 423 | (91,6%) | 366 | (98,0%) |
| yes | 46 | (5,5%) | 39 | (8,4%) | 7 | (2,0%) |
| Stop-Bang score for obstructive sleep apnea (OSA) [short version:  snoring, choking, tiresomeness,  high-blood pressure] | 4 | 5 | (0,7%) | 2 | (0,4%) | 4 | (1,0%) |
| 3 | 26 | (3,1%) | 3 | (0,7%) | 23 | (6,1%) |
| 2 | 70 | (8,5%) | 34 | (7,5%) | 37 | (9,8%) |
| 1 | 255 | (31,0%) | 144 | (32,0%) | 111 | (29,8%) |
| 0 | 468 | (56,7%) | 269 | (59,5%) | 199 | (53,3%) |
| NA | 11 | (1,3%) | 10 | (2,2%) | 1 | (0,2%) |

*Percentages refer to the total number of patients in the study (N= 835).

Table Bedtime habits related to screens

|  | | Do you often use a device with a bright screen in bed? (Tablet, computer, mobile phone) | | Do you often  watch TV in bed  before going to sleep? | | Do you usually sleep with your mobile phone turned on nearby? | |
| --- | --- | --- | --- | --- | --- | --- | --- |
| total | total | 463 | (55,39%) | 435 | (52,13%) | 543 | (64,99%) |
| gender | Female | 277 | (59,97%) | 239 | (51,70%) | 328 | (71,03%) |
| Male | 185 | (49,70%) | 196 | (52,68%) | 214 | (57,50%) |
| Age range | 18-30 | 148 | (86,53%) | 70 | (41,06%) | 134 | (78,43%) |
| 31-40 | 124 | (73,43%) | 102 | (60,13%) | 129 | (76,58%) |
| 41-50 | 85 | (48,06%) | 93 | (53,10%) | 108 | (61,62%) |
| 51-60 | 51 | (37,99%) | 61 | (45,46%) | 78 | (58,40%) |
| >60 | 55 | (29,70%) | 110 | (58,96%) | 93 | (50,00%) |

*Percentages refer to the total number of patients in the study (N= 835).

Table . Time uses

|  | total | | | | Female | | | | Male | | | |
| --- | --- | --- | --- | --- | --- | --- | --- | --- | --- | --- | --- | --- |
| Min | Mean | Std.dev | max | Min | Mean | Std.dev | max | Min | Mean | Std.dev | max |
| Hours of TV per day | 0,0 | **1,9** | (1,7) | 15,0 | 0,0 | **1,8** | (1,7) | 15,0 | 0,0 | **2,0** | (1,7) | 8,0 |
| Hours in front of a screen per day for professional reasons | 0,0 | **4,6** | (3,1) | 14,5 | 0,0 | **5,4** | (3,1) | 14,5 | 0,0 | **3,8** | (2,9) | 14,0 |
| Hours in front of a screen per day without professional reasons | 0,0 | **2,0** | (1,9) | 15,0 | 0,0 | **2,1** | (1,9) | 12,0 | 0,0 | **1,9** | (1,9) | 15,0 |
| Hours in front of a screen per day | 0,0 | **8,6** | (4,1) | 30,0 | 0,0 | **9,3** | (4,4) | 30,0 | 1,2 | **7,7** | (3,7) | 27,0 |
| Time spent in transport per day | 0,0 | **1,3** | (1,6) | 14,0 | 0,0 | **1,0** | (1,1) | 14,0 | 0,0 | **1,5** | (2,0) | 10,0 |

Table . Means and standard deviations for various scales by gender

|  | total | | Female | | Male | |
| --- | --- | --- | --- | --- | --- | --- |
| ODSI Score (Diurnal Sleepiness) | 5,3 | (5,23) | 5,8 | (5,27) | 4,7 | (5,12) |
| Pichot Fatigue Scale Score | 14,7 | (5,54) | 15,7 | (5,74) | 13,3 | (4,93) |
| Pichot Morale Scale Score | 1,4 | (2,33) | 1,7 | (2,58) | 1,0 | (1,91) |
| HAD Anxiety Dimension Score | 5,9 | (3,01) | 6,7 | (2,92) | 5,1 | (2,89) |
| HAD Depressive Dimension Score | 5,6 | (2,03) | 5,7 | (2,06) | 5,4 | (1,97) |
| SINOP Score (severity and clinical phenotyping of the sleep apnea-hypopnea syndrome) | 17,1 | (1,72) | 17,3 | (1,62) | 16,9 | (1,81) |

## Exponentiated coefficients for multilevel models

Table . Regression models with no controls for actually slept hours

|  | **Enough sleep** | **Lost sleep** | **Sleeps well** | **Insomnia** |
| --- | --- | --- | --- | --- |
| Hours of sleep in a weekday | 2.88*** | 0.91*** | 1.09 | 0.61*** |
| Hours of sleep during weekends and holidays | 0.89 | 1.03* | 1.30* | 1.09 |
|  |  |  |  |  |
| Gender | Not shown | Not shown | Not shown | Not shown |
| Age (years) |
| Education |
|  |  |  |  |  |
| Permanent sport activity | 1.16 | 0.95 | 1.45* | 0.77 |
| Usually drives | 0.78 | 0.94 | 1.21* | 0.78 |
| Drinks alcohol in the evening | 0.57 | 1.08 | 1.07 | 1.12 |
| Smoker | 1.85† | 1.16** | 0.59 | 1.13 |
| Work affects sleep quality | 0.56*** | 1.00 | 0.79 | 0.97 |
| Does night shifts | 1.05 | 1.04 | 1.41 | 1.65 |
| Time spent in transport per day | 0.79* | 0.98 | 0.89 | 1.20** |
|  |  |  |  |  |
| Usually takes medication to help fall asleep | 2.05 | 0.97 | 0.47† | 1.97 |
| Takes drugs for ... |  |  |  |  |
| For the heart and blood vessels | 3.28*** | 1.19† | 0.75 | 0.95 |
| For mood or anxiety | 1.09 | 0.88† | 0.37 | 1.68 |
| For sleep | 0.60 | 1.48* | 1.21 | 6.48** |
| For pain | 0.46* | 1.00 | 1.00 | 0.96 |
| For breathing | 1.11 | 0.85 | 0.40 | 3.87 |
| For diabetes | 0.46 | 0.90 | 1.19 | 0.08 |
| For a thyroid condition | 1.11 | 0.85* | 4.14* | 1.40 |
| To improve memory | 3.07** | 0.98 | 4.02** | 0.65 |
| Other medication | 1.15 | 1.09 | 2.78† | 0.22* |
|  |  |  |  |  |
| Number of times urinating at night | 1.51* | 1.01 | 1.02 | 1.20 |
| Waking up of pain during night | 1.01 | 0.69*** | 0.51 | 1.21 |
| Leg-pain hinders sleep | 1.81 | 1.03 | 1.59 | 1.68 |
| STOP-Bang Total Score | 0.65† | 1.03 | 0.69* | 1.26 |
|  |  |  |  |  |
| Bedroom: good quality | 1.25 | 0.98 | 1.63** | 0.50*** |
| Sleeps... |  |  |  |  |
| ... alone | 1.18 | 0.92 | 1.02 | 2.52** |
| ... with spouse | 0.93 | 0.96 | 0.77 | 2.05* |
| ... with child(ren) | 0.52 | 1.04 | 1.02 | 1.13 |
| ... with pet(s) | 0.45 | 1.00 | 1.45 | 3.68* |
|  |  |  |  |  |
| Hours of TV per day | 0.92 | 1.04* | 0.98 | 1.05 |
| Hours/day in front of a screen for professional reasons | 0.97 | 1.00 | 0.96* | 1.08 |
| Hours/day in front of a screen -no professional reasons | 0.99 | 0.97* | 1.01 | 1.02 |
| Usually uses a bright-screen-device in bed | 0.70 | 1.06 | 1.31 | 0.96 |
| Usually watches TV in bed | 1.11 | 1.06† | 1.04 | 0.45*** |
| Usually sleeps with mobile phone turned on nearby | 0.62 | 0.99 | 0.49*** | 1.00 |
|  |  |  |  |  |
| Depression | 1.36 | 1.08 | 0.54† | 0.81 |
| Pichot Morale Scale Score | 1.00 | 0.97*** | 0.88* | 1.13*** |
| Pichot Fatigue Scale Score | 0.64 | 1.04 | 0.71 | 0.76* |
| ODSI Score | 0.95* | 1.03*** | 0.96† | 0.99 |
| HAD Anxiety Dimension Score | 0.93* | 0.99 | 0.96 | 1.29*** |
| HAD Depressive Dimension Score | 1.13* | 1.00 | 0.99 | 0.84*** |
| Observations | 747 | 344 | 747 | 747 |

† *p* < 0.10, * *p* < 0.05, ** *p* < 0.01, *** *p* < 0.001. Coefficients for gender, age, and education are not shown to increase readability. All coefficients were obtained in Stata 17, using meologit for models 1 & 3, mixed for the second model (the predicted value is the logarithmic transformation of the number of loss minutes of sleep to which was added 0.1), and melogit for the last model.
